# Supplementary material for: Revelation of genetic diversity and structure of wild Elymus excelsus (Poaceae: Triticeae) collection from western China by SSR markers
Source: PeerJ. 2019 Nov 12;7:e8038. doi: 10.7717/peerj.8038 (PMC6857585; doi:10.7717/peerj.8038)
Supplement: Table S5 [file peerj-07-8038-s007.xlsx]

## Sheet: The results of Mantel test 
Groups	Factors	r	P
All	Geographical distance	0.2019	＜0.01
	Average annual precipitation	0.3226	＜0.01
	Average annual temperature	-0.0312	0.418
	Elevation	0.1614	0.032
	Average precipitation from May to August	0.3228	＜0.01
XJC	Geographical distance	0.133	0.261
	Average annual precipitation	0.0788	0.302
	Average annual temperature	-0.077	0.305
	Elevation	-0.1642	0.04
	Average precipitation from May to August	0.0005	0.433
SCC	Geographical distance	0.083	0.33
	Average annual precipitation	0.7351	＜0.01
	Average annual temperature	0.3194	0.099
	Elevation	0.0526	0.291
	Average precipitation from May to August	0.697	＜0.01
GSC	Geographical distance	-0.9716	0.5
	Average annual precipitation	0.803	0.5
	Average annual temperature	-0.945	0.5
	Elevation	-0.9829	0.5
	Average precipitation from May to August	0.4651	0.5
QTP	Geographical distance	-0.0146	0.5029
	Average annual precipitation	0.5525	＜0.01
	Average annual temperature	-0.0323	0.5739
	Elevation	-0.0524	0.4543
	Average precipitation from May to August	0.4765	0.012

## Sheet: GD matrix at species level
The genetic distance matrix at species level
	Ee 01	Ee 02	Ee 03	Ee 04	Ee 05	Ee 06	Ee 07	Ee 08	Ee 09	Ee 10	Ee 11	Ee 12	Ee 13	Ee 14	Ee 15	Ee 16	Ee 17	Ee 18	Ee 19	Ee 20	Ee 21	Ee 22	Ee 23	Ee 24	Ee 25
Ee 01	0
Ee 02	0.07289	0
Ee 03	0.07927	0.07781	0
Ee 04	0.0991	0.08523	0.08605	0
Ee 05	0.10366	0.0951	0.07229	0.05045	0
Ee 06	0.08411	0.11765	0.08923	0.10909	0.10769	0
Ee 07	0.1003	0.10345	0.08709	0.12426	0.10511	0.09202	0
Ee 08	0.08696	0.13196	0.10429	0.13595	0.1227	0.10972	0.1315	0
Ee 09	0.10429	0.13043	0.13939	0.11045	0.12727	0.12693	0.16616	0.16049	0
Ee 10	0.09639	0.09402	0.10714	0.09091	0.10119	0.11854	0.1276	0.11515	0.10778	0
Ee 11	0.11246	0.13793	0.14715	0.10651	0.12312	0.11043	0.14371	0.14373	0.11782	0.07418	0
Ee 12	0.13514	0.13068	0.13353	0.11696	0.1276	0.15152	0.1716	0.14804	0.13433	0.09091	0.10651	0
Ee 13	0.14458	0.16239	0.15476	0.13783	0.14286	0.14894	0.17507	0.16364	0.1497	0.11765	0.1276	0.15543	0
Ee 14	0.0991	0.125	0.1276	0.12281	0.13353	0.10909	0.13609	0.11782	0.1403	0.11437	0.11243	0.1462	0.09091	0
Ee 15	0.12693	0.12865	0.1315	0.10843	0.1315	0.15	0.15244	0.17757	0.15077	0.11178	0.12805	0.16265	0.16012	0.16867	0
Ee 16	0.13415	0.16427	0.1506	0.13353	0.15663	0.16308	0.17718	0.14724	0.16364	0.10714	0.10511	0.13353	0.1369	0.15134	0.1682	0
Ee 17	0.1506	0.18519	0.16667	0.15543	0.16667	0.14894	0.18694	0.14545	0.17365	0.12941	0.10979	0.13196	0.13529	0.13783	0.17221	0.10119	0
Ee 18	0.13333	0.15759	0.15569	0.13864	0.14371	0.15596	0.17015	0.14634	0.16265	0.12426	0.11642	0.13274	0.13018	0.12684	0.16109	0.11377	0.07692	0
Ee 19	0.14286	0.13196	0.1411	0.11782	0.1411	0.15361	0.1682	0.20625	0.16049	0.12727	0.11315	0.12991	0.18182	0.16616	0.15265	0.15951	0.15758	0.14634	0
Ee 20	0.16981	0.21068	0.18012	0.17431	0.19255	0.2	0.21362	0.18354	0.18125	0.14724	0.14551	0.15596	0.19018	0.1682	0.19874	0.1677	0.15951	0.17284	0.18987	0
Ee 21	0.15584	0.17431	0.15385	0.15457	0.16667	0.19344	0.1885	0.17647	0.21935	0.18354	0.1885	0.19874	0.22785	0.18612	0.21173	0.19231	0.20886	0.17834	0.18301	0.19868	0
Ee 22	0.19122	0.21893	0.20124	0.18293	0.18885	0.17089	0.19753	0.19874	0.21495	0.18654	0.16049	0.19512	0.17431	0.1682	0.2327	0.17647	0.1682	0.17538	0.22397	0.20128	0.24092	0
Ee 23	0.18675	0.22507	0.20833	0.21408	0.22024	0.20365	0.21068	0.22424	0.25749	0.21765	0.22849	0.22581	0.24118	0.21408	0.26888	0.20238	0.21765	0.18935	0.24242	0.23926	0.22152	0.21101	0
Ee 24	0.19277	0.20798	0.19643	0.21994	0.21429	0.17933	0.18101	0.20606	0.24551	0.21176	0.22849	0.2434	0.21176	0.18475	0.26284	0.22024	0.23529	0.21893	0.27273	0.25767	0.24684	0.19266	0.11765	0
Ee 25	0.21824	0.22086	0.24116	0.20886	0.23473	0.21053	0.25	0.26557	0.26861	0.2381	0.23077	0.24051	0.27619	0.24051	0.24183	0.27331	0.28254	0.25879	0.22623	0.31561	0.25086	0.33113	0.30159	0.33333	0

## Sheet: APG matrix at species level
The matrix of average precipitation of growth season at species level
	Ee 01	Ee 02	Ee 03	Ee 04	Ee 05	Ee 06	Ee 07	Ee 08	Ee 09	Ee 10	Ee 11	Ee 12	Ee 13	Ee 14	Ee 15	Ee 16	Ee 17	Ee 18	Ee 19	Ee 20	Ee 21	Ee 22	Ee 23	Ee 24	Ee 25
Ee 01	0
Ee 02	16	0
Ee 03	28.5	12.5	0
Ee 04	0.5	15.5	28	0
Ee 05	32.5	16.5	4	32	0
Ee 06	17.75	1.75	10.75	17.25	14.75	0
Ee 07	12.75	28.75	41.25	13.25	45.25	30.5	0
Ee 08	65.5	81.5	94	66	98	83.25	52.75	0
Ee 09	24.25	8.25	4.25	23.75	8.25	6.5	37	89.75	0
Ee 10	20	4	8.5	19.5	12.5	2.25	32.75	85.5	4.25	0
Ee 11	73.75	89.75	102.25	74.25	106.25	91.5	61	8.25	98	93.75	0
Ee 12	47.25	63.25	75.75	47.75	79.75	65	34.5	18.25	71.5	67.25	26.5	0
Ee 13	52	68	80.5	52.5	84.5	69.75	39.25	13.5	76.25	72	21.75	4.75	0
Ee 14	51.25	67.25	79.75	51.75	83.75	69	38.5	14.25	75.5	71.25	22.5	4	0.75	0
Ee 15	2.75	13.25	25.75	2.25	29.75	15	15.5	68.25	21.5	17.25	76.5	50	54.75	54	0
Ee 16	81.5	97.5	110	82	114	99.25	68.75	16	105.75	101.5	7.75	34.25	29.5	30.25	84.25	0
Ee 17	65.75	81.75	94.25	66.25	98.25	83.5	53	0.25	90	85.75	8	18.5	13.75	14.5	68.5	15.75	0
Ee 18	65.25	81.25	93.75	65.75	97.75	83	52.5	0.25	89.5	85.25	8.5	18	13.25	14	68	16.25	0.5	0
Ee 19	17.75	1.75	10.75	17.25	14.75	0	30.5	83.25	6.5	2.25	91.5	65	69.75	69	15	99.25	83.5	83	0
Ee 20	55.75	71.75	84.25	56.25	88.25	73.5	43	9.75	80	75.75	18	8.5	3.75	4.5	58.5	25.75	10	9.5	73.5	0
Ee 21	40.25	24.25	11.75	39.75	7.75	22.5	53	105.75	16	20.25	114	87.5	92.25	91.5	37.5	121.75	106	105.5	22.5	96	0
Ee 22	51	67	79.5	51.5	83.5	68.75	38.25	14.5	75.25	71	22.75	3.75	1	0.25	53.75	30.5	14.75	14.25	68.75	4.75	91.25	0
Ee 23	104.75	120.75	133.25	105.25	137.25	122.5	92	39.25	129	124.75	31	57.5	52.75	53.5	107.5	23.25	39	39.5	122.5	49	145	53.75	0
Ee 24	94.5	110.5	123	95	127	112.25	81.75	29	118.75	114.5	20.75	47.25	42.5	43.25	97.25	13	28.75	29.25	112.25	38.75	134.75	43.5	10.25	0
Ee 25	11.25	4.75	17.25	10.75	21.25	6.5	24	76.75	13	8.75	85	58.5	63.25	62.5	8.5	92.75	77	76.5	6.5	67	29	62.25	116	105.75	0

## Sheet: GeoD at species level
The matrix of geographical distance at species level
	Ee 01	Ee 02	Ee 03	Ee 04	Ee 05	Ee 06	Ee 07	Ee 08	Ee 09	Ee 10	Ee 11	Ee 12	Ee 13	Ee 14	Ee 15	Ee 16	Ee 17	Ee 18	Ee 19	Ee 20	Ee 21	Ee 22	Ee 23	Ee 24	Ee 25
Ee 01	0
Ee 02	244422	0
Ee 03	112723	295532	0
Ee 04	135496	377752	128475	0
Ee 05	282181	520785	240604	147420	0
Ee 06	17382.3	231957	105951	146039	291303	0
Ee 07	420137	660116	377719	284669	139412	429977	0
Ee 08	1.94326e+06	1.73225e+06	2.02338e+06	2.074e+06	2.22055e+06	1.93773e+06	2.3519e+06	0
Ee 09	139797	117315	178309	266351	406056	124443	545456	1.84697e+06	0
Ee 10	256067	13312.2	304035	388824	531211	243272	670595	1.72603e+06	126362	0
Ee 11	1.90585e+06	1.72543e+06	1.99988e+06	2.02731e+06	2.16855e+06	1.90372e+06	2.29009e+06	380389	1832213	1.72197e+06	0
Ee 12	1.72828e+06	1.56746e+06	1.8281e+06	1.84334e+06	1.98031e+06	1.72793e+06	2.09596e+06	584948	1.6678e+06	1.56562e+06	254681	0
Ee 13	1.95176e+06	1.74002e+06	2.03145e+06	2.08269e+06	2.22931e+06	1.94615e+06	2.36089e+06	13551.1	1.8549e+06	1.73373e+06	392444	598332	0
Ee 14	1.73418e+06	1.5191e+06	1.81165e+06	1.86612e+06	2.01313e+06	1.72808e+06	2.146e+06	219061	1.63454e+06	1.51252e+06	456141	575723	224558	0
Ee 15	6915.4	237673	116139	142411	289074	14580.3	427050	1.93661e+06	133785	249359	1.89972e+06	1.72251e+06	1.94511e+06	1.72747e+06	0
Ee 16	1.95068e+06	1.76948e+06	2.04448e+06	2.07232e+06	2.21366e+06	1.94849e+06	2.33531e+06	376311	1.87653e+06	1.76594e+06	45308.8	293093	387558	473565	1.94454e+06	0
Ee 17	1.90273e+06	1.72231e+06	1.99676e+06	2.02419e+06	2.16544e+06	1.9006e+06	2.28699e+06	380276	1.82909e+06	1.71885e+06	3124.35	252501	392381	454545	1.8966e+06	48380.6	0
Ee 18	1.87424e+06	1.69395e+06	1.96829e+06	1.99572e+06	2.13699e+06	1.87211e+06	2.2586e+06	381663	1.80067e+06	1.69051e+06	31606.7	232677	394183	441856	1.86812e+06	76704.3	28485	0
Ee 19	107892	136723	172826	241239	385500	95275.6	524564	1.85164e+06	43671.6	148208	1.82773e+06	1.65851e+06	1.85982e+06	1.64062e+06	101227	1.87227e+06	1.82461e+06	1.79615e+06	0
Ee 20	1.73787e+06	1.52635e+06	1.81756e+06	1.86893e+06	2.01562e+06	1.73223e+06	2.14745e+06	205898	1.64109e+06	1.52014e+06	409009	528904	213937	48279.2	1.73122e+06	427630	407349	394136	1.64589e+06	0
Ee 21	606169	364583	657493	741055	885222	595029	1.02446e+06	1.39773e+06	480919	354646	1.43626e+06	1.31275e+06	1.40444e+06	1.18066e+06	599287	1.4784e+06	1.43319e+06	1.40551e+06	500007	1.19292e+06	0
Ee 22	1.68867e+06	1.47359e+06	1.76611e+06	1.82064e+06	1.96767e+06	1.68255e+06	2.1006e+06	263064	1.58901e+06	1467024	471785	571208	269097	45544.3	1.68196e+06	492855	469947	454892	1.59507e+06	69520.8	1.13558e+06	0
Ee 23	2.03156e+06	1.85114e+06	2.12571e+06	2.15278e+06	2.29381e+06	2.02947e+06	2.41492e+06	405875	1.95803e+06	1.84764e+06	125834	354162	415454	532168	2.02544e+06	81838.9	128959	157418	1.95357e+06	488285	1.56005e+06	555755	0
Ee 24	1.93265e+06	1.73593e+06	2.02019e+06	2.05931e+06	2.20377e+06	1.92881e+06	2.33064e+06	192359	1.84731e+06	1.73108e+06	189611	416045	203880	316739	1.92623e+06	184118	189797	195026	1.84738e+06	276636	1.42192e+06	346010	222516	0
Ee 25	127209	117335	189198	260600	404668	114660	543788	1.83444e+06	36505.4	128860	1.81278e+06	1.64503e+06	1.84257e+06	1.62312e+06	120516	1.85726e+06	1.80966e+06	1.78121e+06	19389.4	1.62866e+06	480727	1.57758e+06	1.93862e+06	1.83122e+06	0

## Sheet: Alt matrix at species level
The matrix of altitude distance at species level
	Ee 01	Ee 02	Ee 03	Ee 04	Ee 05	Ee 06	Ee 07	Ee 08	Ee 09	Ee 10	Ee 11	Ee 12	Ee 13	Ee 14	Ee 15	Ee 16	Ee 17	Ee 18	Ee 19	Ee 20	Ee 21	Ee 22	Ee 23	Ee 24	Ee 25
Ee 01	0
Ee 02	242	0
Ee 03	1777	1535	0
Ee 04	128	114	1649	0
Ee 05	1836	1594	59	1708	0
Ee 06	1108	866	669	980	728	0
Ee 07	215	27	1562	87	1621	893	0
Ee 08	923	1165	2700	1051	2759	2031	1138	0
Ee 09	1489	1247	288	1361	347	381	1274	2412	0
Ee 10	544	302	1233	416	1292	564	329	1467	945	0
Ee 11	1706	1948	3483	1834	3542	2814	1921	783	3195	2250	0
Ee 12	2008	2250	3785	2136	3844	3116	2223	1085	3497	2552	302	0
Ee 13	65	307	1842	193	1901	1173	280	858	1554	609	1641	1943	0
Ee 14	1035	1277	2812	1163	2871	2143	1250	112	2524	1579	671	973	970	0
Ee 15	182	60	1595	54	1654	926	33	1105	1307	362	1888	2190	247	1217	0
Ee 16	1728	1970	3505	1856	3564	2836	1943	805	3217	2272	22	280	1663	693	1910	0
Ee 17	1341	1583	3118	1469	3177	2449	1556	418	2830	1885	365	667	1276	306	1523	387	0
Ee 18	1433	1675	3210	1561	3269	2541	1648	510	2922	1977	273	575	1368	398	1615	295	92	0
Ee 19	1230	988	547	1102	606	122	1015	2153	259	686	2936	3238	1295	2265	1048	2958	2571	2663	0
Ee 20	1242	1484	3019	1370	3078	2350	1457	319	2731	1786	464	766	1177	207	1424	486	99	191	2472	0
Ee 21	1425	1183	352	1297	411	317	1210	2348	64	881	3131	3433	1490	2460	1243	3153	2766	2858	195	2667	0
Ee 22	1226	1468	3003	1354	3062	2334	1441	303	2715	1770	480	782	1161	191	1408	502	115	207	2456	16	2651	0
Ee 23	1810	2052	3587	1938	3646	2918	2025	887	3299	2354	104	198	1745	775	1992	82	469	377	3040	568	3235	584	0
Ee 24	1947	2189	3724	2075	3783	3055	2162	1024	3436	2491	241	61	1882	912	2129	219	606	514	3177	705	3372	721	137	0
Ee 25	494	252	1283	366	1342	614	279	1417	995	50	2200	2502	559	1529	312	2222	1835	1927	736	1736	931	1720	2304	2441	0

## Sheet: AP matrix at species level
The matrix of average annual precipitation at species level
	Ee 01	Ee 02	Ee 03	Ee 04	Ee 05	Ee 06	Ee 07	Ee 08	Ee 09	Ee 10	Ee 11	Ee 12	Ee 13	Ee 14	Ee 15	Ee 16	Ee 17	Ee 18	Ee 19	Ee 20	Ee 21	Ee 22	Ee 23	Ee 24	Ee 25
Ee 01	0
Ee 02	60	0
Ee 03	126	66	0
Ee 04	2	62	128	0
Ee 05	147	87	21	149	0
Ee 06	69	9	57	71	78	0
Ee 07	171	231	297	169	318	240	0
Ee 08	486	546	612	484	633	555	315	0
Ee 09	67	7	59	69	80	2	238	553	0
Ee 10	79	19	47	81	68	10	250	565	12	0
Ee 11	443	503	569	441	590	512	272	43	510	522	0
Ee 12	276	336	402	274	423	345	105	210	343	355	167	0
Ee 13	389	449	515	387	536	458	218	97	456	468	54	113	0
Ee 14	330	390	456	328	477	399	159	156	397	409	113	54	59	0
Ee 15	11	49	115	13	136	58	182	497	56	68	454	287	400	341	0
Ee 16	489	549	615	487	636	558	318	3	556	568	46	213	100	159	500	0
Ee 17	403	463	529	401	550	472	232	83	470	482	40	127	14	73	414	86	0
Ee 18	403	463	529	401	550	472	232	83	470	482	40	127	14	73	414	86	0	0
Ee 19	21	39	105	23	126	48	192	507	46	58	464	297	410	351	10	510	424	424	0
Ee 20	360	420	486	358	507	429	189	126	427	439	83	84	29	30	371	129	43	43	381	0
Ee 21	220	160	94	222	73	151	391	706	153	141	663	496	609	550	209	709	623	623	199	580	0
Ee 22	318	378	444	316	465	387	147	168	385	397	125	42	71	12	329	171	85	85	339	42	538	0
Ee 23	624	684	750	622	771	693	453	138	691	703	181	348	235	294	635	135	221	221	645	264	844	306	0
Ee 24	617	677	743	615	764	686	446	131	684	696	174	341	228	287	628	128	214	214	638	257	837	299	7	0
Ee 25	14	46	112	16	133	55	185	500	53	65	457	290	403	344	3	503	417	417	7	374	206	332	638	631	0

## Sheet: AT matrix at species level
The matrix of average annual temperature at species level
	Ee 01	Ee 02	Ee 03	Ee 04	Ee 05	Ee 06	Ee 07	Ee 08	Ee 09	Ee 10	Ee 11	Ee 12	Ee 13	Ee 14	Ee 15	Ee 16	Ee 17	Ee 18	Ee 19	Ee 20	Ee 21	Ee 22	Ee 23	Ee 24	Ee 25
Ee 01	0
Ee 02	0.475	0
Ee 03	8	7.525	0
Ee 04	1.55	2.025	9.55	0
Ee 05	6.533	6.058	1.467	8.083	0
Ee 06	5.608	5.133	2.392	7.158	0.925	0
Ee 07	0.938	1.413	8.938	0.613	7.471	6.546	0
Ee 08	2.725	2.25	5.275	4.275	3.808	2.883	3.663	0
Ee 09	6.054	5.579	1.946	7.604	0.479	0.446	6.992	3.329	0
Ee 10	1.788	1.313	6.213	3.338	4.746	3.821	2.725	0.938	4.267	0
Ee 11	2.246	1.771	5.754	3.796	4.288	3.363	3.183	0.479	3.808	0.458	0
Ee 12	1.004	0.529	6.996	2.554	5.529	4.604	1.942	1.721	5.05	0.783	1.242	0
Ee 13	6.892	6.417	1.108	8.442	0.358	1.283	7.829	4.167	0.838	5.104	4.646	5.888	0
Ee 14	0.5	0.025	7.5	2.05	6.033	5.108	1.438	2.225	5.554	1.288	1.746	0.504	6.392	0
Ee 15	1.071	0.596	6.929	2.621	5.463	4.538	2.008	1.654	4.983	0.717	1.175	0.067	5.821	0.571	0
Ee 16	1.938	1.463	6.063	3.488	4.596	3.671	2.875	0.788	4.117	0.15	0.308	0.933	4.954	1.438	0.867	0
Ee 17	4.45	3.975	3.55	6	2.083	1.158	5.388	1.725	1.604	2.663	2.204	3.446	2.442	3.95	3.379	2.513	0
Ee 18	3.846	3.371	4.154	5.396	2.688	1.763	4.783	1.121	2.208	2.058	1.6	2.842	3.046	3.346	2.775	1.908	0.604	0
Ee 19	5.267	4.792	2.733	6.817	1.267	0.342	6.204	2.542	0.788	3.479	3.021	4.263	1.625	4.767	4.196	3.329	0.817	1.421	0
Ee 20	0.083	0.558	8.083	1.467	6.617	5.692	0.854	2.808	6.138	1.871	2.329	1.088	6.975	0.583	1.154	2.021	4.533	3.929	5.35	0
Ee 21	8.654	8.179	0.654	10.204	2.121	3.046	9.592	5.929	2.6	6.867	6.408	7.65	1.763	8.154	7.583	6.717	4.204	4.808	3.388	8.738	0
Ee 22	0.583	1.058	8.583	0.967	7.117	6.192	0.354	3.308	6.638	2.371	2.829	1.588	7.475	1.083	1.654	2.521	5.033	4.429	5.85	0.5	9.238	0
Ee 23	1	0.525	7	2.55	5.533	4.608	1.938	1.725	5.054	0.788	1.246	0.004	5.892	0.5	0.071	0.938	3.45	2.846	4.267	1.083	7.654	1.583	0
Ee 24	0.788	1.263	8.788	0.763	7.321	6.396	0.15	3.513	6.842	2.575	3.033	1.792	7.679	1.288	1.858	2.725	5.238	4.633	6.054	0.704	9.442	0.204	1.788	0
Ee 25	1.879	1.404	6.121	3.429	4.654	3.729	2.817	0.846	4.175	0.092	0.367	0.875	5.013	1.379	0.808	0.058	2.571	1.967	3.388	1.963	6.775	2.463	0.879	2.667	0

## Sheet: GD matrix of SCC
The matrix of genetic distance for Sichuan geo-group
	Ee 08	Ee 11	Ee 12	Ee 13	Ee 16	Ee 17	Ee 18	Ee 23	Ee 24
Ee 08	0
Ee 11	0.14373	0
Ee 12	0.14804	0.10651	0
Ee 13	0.16364	0.1276	0.15543	0
Ee 16	0.14724	0.10511	0.13353	0.1369	0
Ee 17	0.14545	0.10979	0.13196	0.13529	0.10119	0
Ee 18	0.14634	0.11642	0.13274	0.13018	0.11377	0.07692	0
Ee 23	0.22424	0.22849	0.22581	0.24118	0.20238	0.21765	0.18935	0
Ee 24	0.20606	0.22849	0.2434	0.21176	0.22024	0.23529	0.21893	0.11765	0

## Sheet: GeoD matrix of SCC
The matrix of geographical distance for Sichuan geo-group
	Ee 08	Ee 11	Ee 12	Ee 13	Ee 16	Ee 17	Ee 18	Ee 23	Ee 24
Ee 08	0
Ee 11	361462	0
Ee 12	654300	295272	0
Ee 13	16068.5	377469	670368	0
Ee 16	324702	38861.2	333799	340649	0
Ee 17	363484	2174.63	293143	379494	41031.5	0
Ee 18	383391	23296.8	272392	399424	62144.8	21122.7	0
Ee 23	283256	86937.7	380538	298997	48322.5	89111.9	110219	0
Ee 24	172513	189246	483477	188454	152195	191298	211511	112021	0

## Sheet: APG matrix for SCC
The matrix of average precipitation of growth season for Sichuan geo-group
	Ee 08	Ee 11	Ee 12	Ee 13	Ee 16	Ee 17	Ee 18	Ee 23	Ee 24
Ee 08	0
Ee 11	8.25	0
Ee 12	18.25	26.5	0
Ee 13	13.5	21.75	4.75	0
Ee 16	16	7.75	34.25	29.5	0
Ee 17	0.25	8	18.5	13.75	15.75	0
Ee 18	0.25	8.5	18	13.25	16.25	0.5	0
Ee 23	39.25	31	57.5	52.75	23.25	39	39.5	0
Ee 24	29	20.75	47.25	42.5	13	28.75	29.25	10.25	0

[truncated: 21 more sheets: Alt matrix for SCC, AP matrix for SCC, AT matrix for SCC, GD matrix of GSC, GeoD matrix of GSC, APG matrix for GSC, Alt matrix for GSC, AP matrix for GSC, AT matrix for GSC, GD matrix of XJC, GeoD matrix of XJC, APG matrix for XJC, Alt matrix for XJC, AP matrix for XJC, AT matrix for XJC, GD matrix of QTP, GeoD matrix of QTP, APG matrix for QTP, Alt matrix for QTP, AP matrix for QTP …]
